# Supplementary material
Source: Springer Nature journal article supplement (https://www.springermedizin.de/resource/supplementary/13014_2013_1038_MOESM2_ESM.pdf/9635166)
Supplement: MOESM2 [file 9635166]

# Client Photon Center

Client

Deutsch

Plan hochladen

Patienten

- PatientID: FMISO43
- StudyID: 1.3.6.1.4.1.2452.6.322955014.1239094653.1832286122.4028698992
- StudyID: 1.3.6.1.4.1.2452.6.2850957804.1255375702.3344402601.1481344759
- PatientID - UKD: 5
- Status: Protonenplan vorhanden

- PatientID: FMISO04
- StudyID: 1.3.6.1.4.1.2452.6.3386789518.1167520004.667485874.3695670796
- PatientID - UKD: 4
- Status: Protonenplan in Arbeit

Löschen

Download Protonenplan

Beenden

Zeige DVH

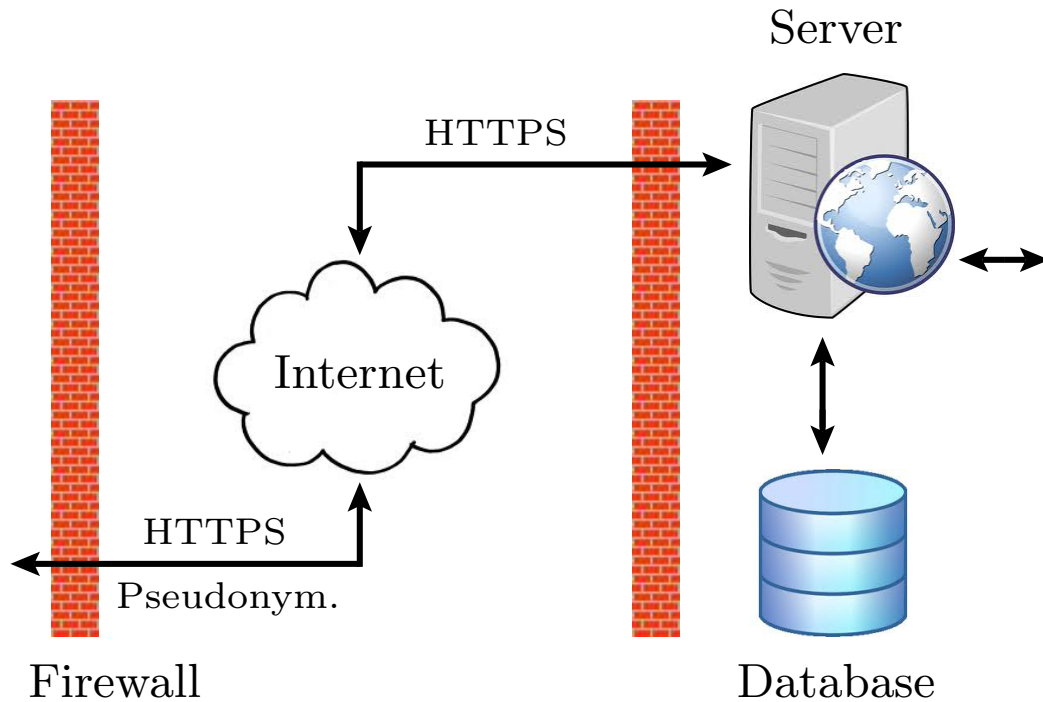

# Client Particle Center

Client OGZ

English

Patients with missing proton plan

Patients with proton plan in progress

Patients with finished proton plan

Upload proton plan

Patients with proton plan in progress

- Patient: 4
- PatientUID: ULICE4
- PatientsAge: 000Y
- Sex: M
- TumorSite: Head & Neck
- Tumor: Glottis
- DiagnosisICD10:
- TNM: T, N, M:
- FractionScheme: Dose per fraction, Number of fractions, Boost:
- Institution:

Download

Close

Show DVH
